# Supplementary material for: TAPBPR bridges UDP-glucose:glycoprotein glucosyltransferase 1 onto MHC class I to provide quality control in the antigen presentation pathway
Source: eLife journal article supplement (doi:10.7554/elife.23049), 2017-04-20
Supplement: supp [file elife-23049-supp-v1.zip]

Archive with 13 entries (13 files):
- elife_poa_e23049_Supplementary_method_source_code.docx
- elife_poa_e23049_Figure_4_Source_Data_File_MHC_I_peptide_elution_from_HeLaKOTAPBPRWT_and_HeLaKOTAPBPRC94A.xlsx
- elife_poa_e23049_Figure_6_Figure_Supplement_1.eps
- elife_poa_e23049_Figure_5_Figure_Supplement_1.eps
- elife_poa_e23049_Figure3_Figure_Supplement_1.eps
- elife_poa_e23049_Figure_3_Figure_Supplement_2.eps
- elife_poa_e23049_Figure_2_Figure_Supplement_1.eps
- elife_poa_e23049_Figure_4_Figure_Supplement_1.eps
- elife_poa_e23049_Figure_5_Figure_Supplement_4.eps
- elife_poa_e23049_Figure_6_Figure_Supplement_2.eps
- elife_poa_e23049_Figure_5_Figure_Supplement_2.eps
- elife_poa_e23049_Figure_5_Figure_Supplement_3.pdf
- elife_poa_e23049_Supplementary_File_1.docx
