# Supplementary material for: TAPBPR bridges UDP-glucose:glycoprotein glucosyltransferase 1 onto MHC class I to provide quality control in the antigen presentation pathway
Source: eLife journal article supplement (doi:10.7554/elife.23049), 2017-04-20
Supplement: supp [file elife-23049-supp-v1.zip › elife_poa_e23049_Figure_5_Figure_Supplement_3.pdf]

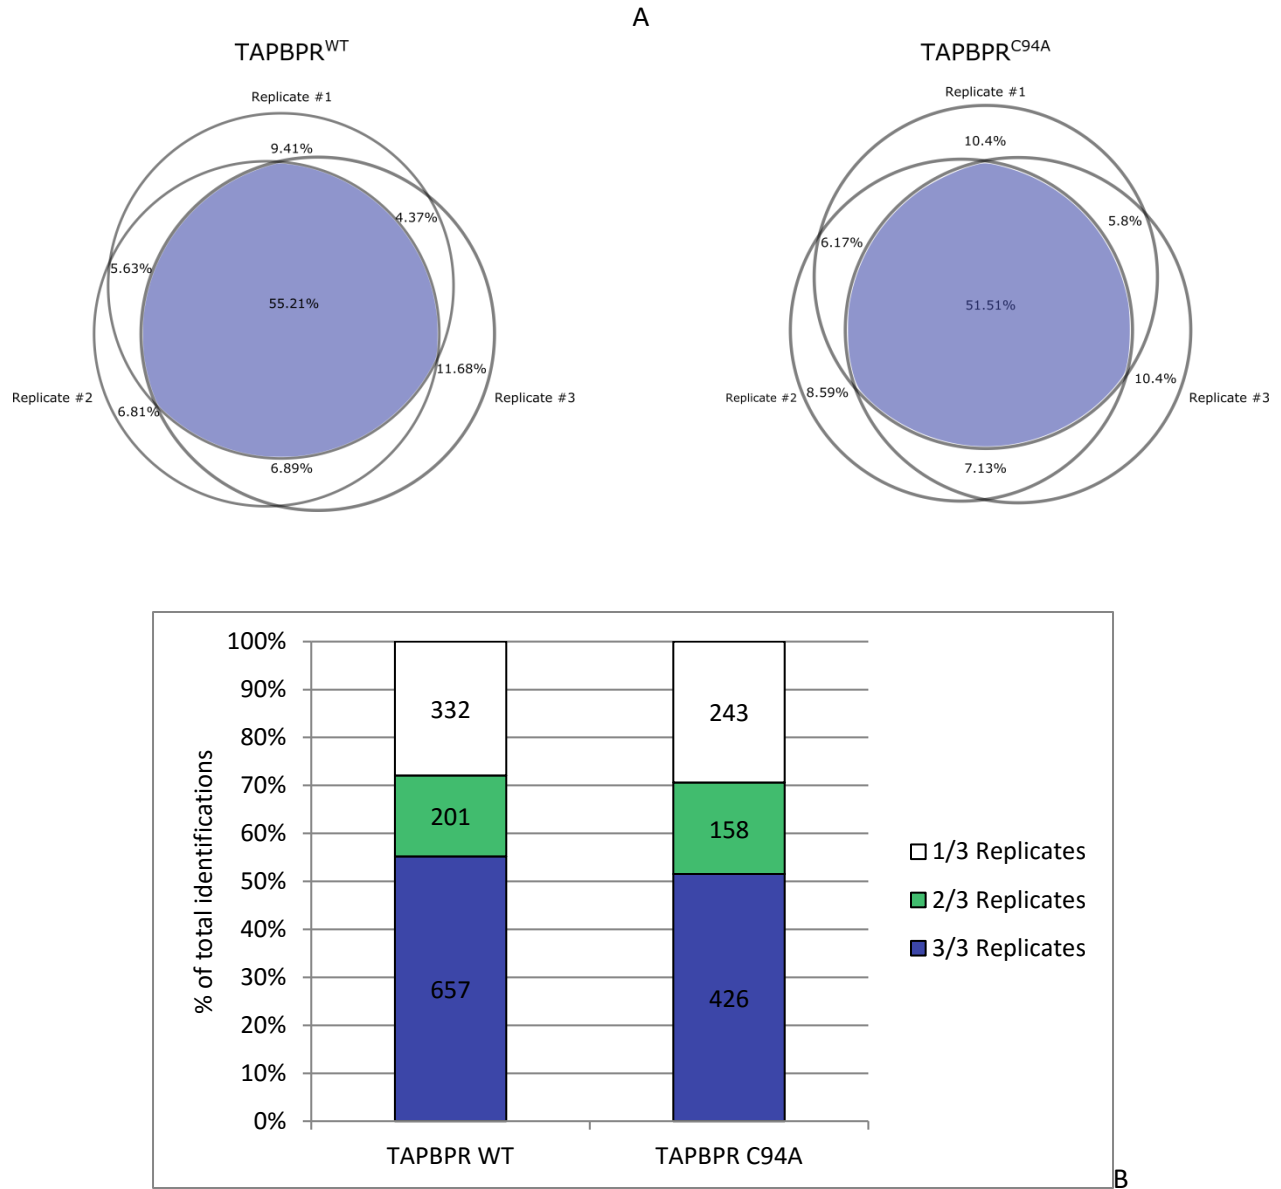

**Figure 5 – Figure Supplement 3. Statistical analysis of peptides isolated from cells expressing TAPBPR<sup>WT</sup> and TAPBPR<sup>C94A</sup>**

A) Reproducibility of peptide identifications in three out of three technical LC-MS/MS runs is 55.21% for the TAPBPR<sup>WT</sup> and 51.51% for the TAPBPR<sup>C94A</sup> mutant. B) Reproduction of peptide identifications as defined in more than one LC-MS/MS runs is at 71% for TAPBPR<sup>WT</sup> and 72% for TAPBPR<sup>C94A</sup>. These reproducibility rates are within the expected range for data dependent acquisition mass spectrometry on Orbitrap XL.
