# Supplementary material for: TAPBPR bridges UDP-glucose:glycoprotein glucosyltransferase 1 onto MHC class I to provide quality control in the antigen presentation pathway
Source: eLife journal article supplement (doi:10.7554/elife.23049), 2017-04-20
Supplement: supp [file elife-23049-supp-v1.zip › elife_poa_e23049_Supplementary_File_1.docx]

| Name | mutation | Primers used for site directed mutagenesis | Predicted TAPBPR domain |
| --- | --- | --- | --- |
| UBS1 | **I83K, E87K** | 5'-GCCTCAGTGGACCTGGTCCAGAAACCCCAGGCCAAGGCCTTGCTCCATGCTGACTGC-3'  5'-GCAGTCAGCATGGAGCAAGGCCTTGGCCTGGGGTTTCTGGACCAGGTCCACTGAGGC-3' | Unique N-terminal |
| UBS2 | **E87K, L90K**  **H91S, D93R** | 5'-GAAACCCCAGGCCAAGGCCTTGAAATCTGCTAGATGCAGTGGGAAGGAGGTGACC-3'  5'-GGTCACCTCCTTCCCACTGCATCTAGCAGATTTCAAGGCCTTGGCCTGGGGTTTC-3' |

Supplementary Table 1 – Primers used to generated TAPBPRUBS1 and TAPBPRUBS2 variant molecules
